# Supplementary figures and images for: The uncertainty of a result from a linear calibration
Source: Royal Society of Chemistry journal article supplement (doi:10.1039/b615398d), 2006-01-01

| DATA  |        |        |             |
|-------|--------|--------|-------------|
| x /mM | y/ mA  |        | x-<x>       |
| 0.01  | 0.0013 |        | -0.267      |
| 0.05  | 0.0350 |        | -0.227      |
| 0.1   | 0.0806 |        | -0.177      |
| 0.25  | 0.1803 |        | -0.027      |
| 0.5   | 0.3244 |        | 0.223       |
| 0.75  | 0.4852 |        | 0.473       |
| mean  | 0.277  | 0.1845 | sumsq 0.428 |

| y0      | x0       | b term   |
|---------|----------|----------|
| 0.00000 | -0.01090 | -0.00716 |
| 0.03000 | 0.03587  | -0.00600 |
| 0.06000 | 0.08263  | -0.00483 |
| 0.09000 | 0.12939  | -0.00367 |
| 0.12000 | 0.17616  | -0.00250 |
| 0.15000 | 0.22292  | -0.00134 |
| 0.18000 | 0.26968  | -0.00017 |
| 0.21000 | 0.31645  | 0.00099  |
| 0.24000 | 0.36321  | 0.00216  |
| 0.27000 | 0.40997  | 0.00332  |
| 0.30000 | 0.45674  | 0.00448  |
| 0.33000 | 0.50350  | 0.00565  |
| 0.36000 | 0.55026  | 0.00681  |
| 0.39000 | 0.59703  | 0.00798  |
| 0.42000 | 0.64379  | 0.00914  |
| 0.45000 | 0.69055  | 0.01031  |
| 0.48000 | 0.73732  | 0.01147  |
| 0.51000 | 0.78408  | 0.01264  |

| LINEST   |          |
|----------|----------|
| b        | a        |
| 0.641528 | 0.006990 |
| 0.015976 | 0.006145 |
| 0.997525 | 0.010456 |
| 1612     | 4.000000 |
| 0.176284 | 0.000437 |

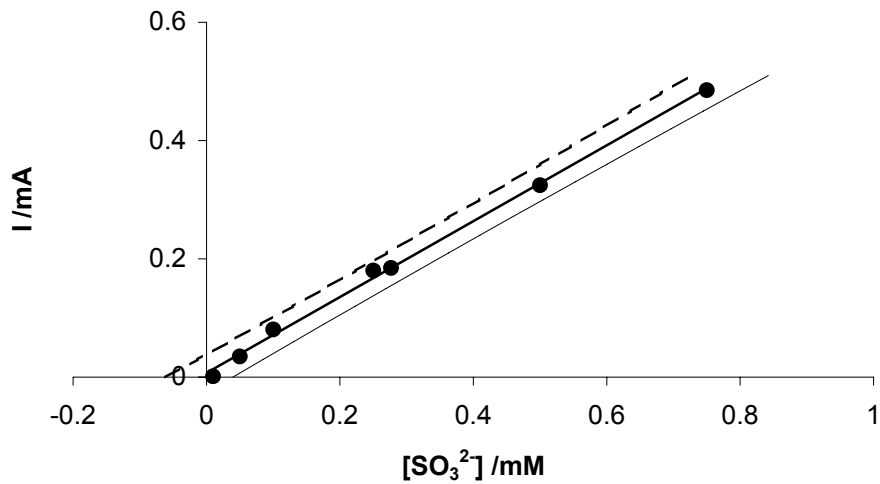

| ybar term | y0 term | sx0    | 95% xdn | xup    | %b    | %ybar | %y0 |     |
|-----------|---------|--------|---------|--------|-------|-------|-----|-----|
| 0.00342   | 0.0163  | 0.0181 | 0.0503  | -0.061 | 0.039 | 16%   | 4%  | 81% |
| 0.00342   | 0.0163  | 0.0177 | 0.0491  | -0.013 | 0.085 | 11%   | 4%  | 85% |
| 0.00342   | 0.0163  | 0.0173 | 0.0481  | 0.034  | 0.131 | 8%    | 4%  | 88% |
| 0.00342   | 0.0163  | 0.0171 | 0.0473  | 0.082  | 0.177 | 5%    | 4%  | 91% |
| 0.00342   | 0.0163  | 0.0168 | 0.0468  | 0.129  | 0.223 | 2%    | 4%  | 94% |
| 0.00342   | 0.0163  | 0.0167 | 0.0464  | 0.177  | 0.269 | 1%    | 4%  | 95% |
| 0.00342   | 0.0163  | 0.0167 | 0.0462  | 0.223  | 0.316 | 0%    | 4%  | 96% |
| 0.00342   | 0.0163  | 0.0167 | 0.0463  | 0.270  | 0.363 | 0%    | 4%  | 95% |
| 0.00342   | 0.0163  | 0.0168 | 0.0466  | 0.317  | 0.410 | 2%    | 4%  | 94% |
| 0.00342   | 0.0163  | 0.0170 | 0.0471  | 0.363  | 0.457 | 4%    | 4%  | 92% |
| 0.00342   | 0.0163  | 0.0172 | 0.0479  | 0.409  | 0.505 | 7%    | 4%  | 89% |
| 0.00342   | 0.0163  | 0.0176 | 0.0488  | 0.455  | 0.552 | 10%   | 4%  | 86% |
| 0.00342   | 0.0163  | 0.0180 | 0.0500  | 0.500  | 0.600 | 14%   | 4%  | 82% |
| 0.00342   | 0.0163  | 0.0185 | 0.0513  | 0.546  | 0.648 | 19%   | 3%  | 78% |
| 0.00342   | 0.0163  | 0.0190 | 0.0527  | 0.591  | 0.697 | 23%   | 3%  | 74% |
| 0.00342   | 0.0163  | 0.0196 | 0.0544  | 0.636  | 0.745 | 28%   | 3%  | 69% |
| 0.00342   | 0.0163  | 0.0202 | 0.0561  | 0.681  | 0.793 | 32%   | 3%  | 65% |
| 0.00342   | 0.0163  | 0.0209 | 0.0580  | 0.726  | 0.842 | 37%   | 3%  | 61% |

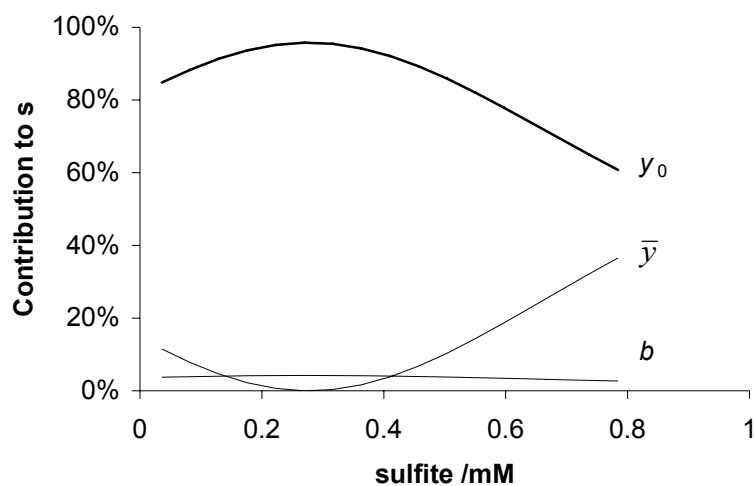

Supplement: b615398d.pdf [file b615398d.pdf]
